# Supplementary material
Source: publisher figshare collection journal article supplement (https://gsajournals.figshare.com/ndownloader/files/22247526)
Supplement: Supplementary file 1 [file 22247526]

| **Sd**  **Supplementary Table 1. Follicle quantification** | | | |
| --- | --- | --- | --- |
|  | **# of follicles** | | **# of samples quantified (n)** |
| **Genotype** | **Primordial** | **Total** |  |
| Wild-type | 826 (± 128) | 1345 (± 201) | 5 |
| *p53-/-;TAp63-/-* | 893 (± 145) | 1417 (± 196) | 3 |
| *Spo11-/-* | 52 (± 31) | 259 (± 71) | 8 |
| *Spo11-/-;p53-/-;TAp63+/-* | 55 (± 11) | 191 (±18) | 3 |
| *Spo11-/-;p53+/-;TAp63-/-* | 39 (± 16) | 181 (± 15) | 3 |
| *Spo11-/-;p53-/-;TAp63-/-* | 860 (± 233) | 1201 (± 236) | 3 |
| *Trip13Gt/Gt* | 0 (± 0) | 0 (± 0) | 3 |
| *Trip13Gt/Gt;p53-/-;TAp63-/-* | 822 (± 88) | 1148 (± 126) | 3 |

Quantification of average primordial follicles and total follicles per genotype shown in Figure 1B.
